# Supplementary material
Source: publisher figshare collection journal article supplement (https://springernature.figshare.com/ndownloader/files/23040377)
Supplement: Supplementary file 1 [file 23040377]

### Supplementary materials

**Algorithm.** We present the parameter-free and scalable BuildHON+ algorithm for constructing HON. The rule extraction step is given in Algorithm 1, and the network wiring step remains the same as that of HON in [2]. While BuildHON+ algorithm is parameter-free, we provide *MaxOrder* and *MinSupport* as optional parameters. We also provide the optional *ThresholdMultiplier* parameter (the default value 1 is consistent with the HON algorithm), for users to control how aggressive the algorithm prevents higher-order dependencies from being generated. Setting the parameter larger than 1 results in less higher-order dependencies, smaller than 1 for more higher-order dependencies.

---

**Algorithm 1** BuildHON+ rule extraction algorithm. Given the raw sequential data  $T$ , extracts arbitrarily high orders of dependencies, and output the dependency rules  $R$ . Optional parameters include  $MaxOrder$ ,  $MinSupport$ , and  $ThresholdMultiplier$

---

```

1: define global  $C$  as nested counter
2: define global  $D, R$  as nested dictionary
3: define global  $SourceToExtSource$ ,  $StartingPoints$  as dictionary
4:
5: function EXTRACTRULES( $T$ , [ $MaxOrder$ ,  $MinSupport$ ,  $ThresholdMultiplier = 1$ ])
6:   global  $MaxOrder$ ,  $MinSupport$ ,  $Aggressiveness$ 
7:   BUILDFIRSTORDEROBSERVATIONS( $T$ )
8:   BUILDFIRSTORDERDISTRIBUTIONS( $T$ )
9:   GENERATEALLRULES( $MaxOrder$ ,  $T$ )
10:
11: function BUILDFIRSTORDEROBSERVATIONS( $T$ )
12:   for  $t$  in  $T$  do
13:     for ( $Source, Target$ ) in  $t$  do
14:        $C[Source][Target] += 1$ 
15:        $IC.add(Source)$ 
16:
17: function BUILDFIRSTORDERDISTRIBUTIONS( $T$ )
18:   for  $Source$  in  $C$  do
19:     for  $Target$  in  $C[Source]$  do
20:       if  $C[Source][Target] < MinSupport$  then
21:          $C[Source][Target] = 0$ 
22:       for  $Target$  in  $C[Source]$  do
23:         if  $thenC[Source][Target] > 0$ 
24:            $D[Source][Target] = C[Source][Target] / (\sum C[Source][*])$ 
25:
26: function GENERATEALLRULES( $MaxOrder$ ,  $T$ )
27:   for  $Source$  in  $D$  do
28:     ADDTORULES( $Source$ )
29:     EXTENDRULE( $Source$ ,  $Source$ , 1,  $T$ )
30:
31: function KLDTHRESHOLD( $NewOrder, ExtSource$ )
32:   return  $ThresholdMultiplier \times NewOrder / \log_2(1 + \sum C[ExtSource][*])$ 
33: function EXTENDRULE( $Valid$ ,  $Curr$ ,  $order$ ,  $T$ )
34:   if  $Order \leq MaxOrder$  then
35:     ADDTORULES( $Source$ )
36:   else
37:      $Distr = D[Valid]$ 
38:     if  $-\log_2(\min(Distr[*].vals)) < KLDTHRESHOLD(order + 1), Curr$  then
39:       ADDTORULES( $Valid$ )
40:   else
41:      $NewOrder = order + 1$ 
42:      $Extended = EXTENDSOURCE(Curr)$ 
43:     if  $Extended = \emptyset$  then
44:       ADDTORULES( $Valid$ )
45:   else
46:     for  $ExtSource$  in  $Extended$  do
47:        $ExtDistr = D[ExtSource]$ 
48:        $divergence = KLD(ExtDistr, Distr)$ 
49:       if  $divergence > KLDTHRESHOLD(NewOrder, ExtSource)$  then
50:         EXTENDRULE( $ExtSource$ ,  $ExtSource$ ,  $NewOrder$ ,  $T$ )
51:       else
52:         EXTENDRULE( $Valid$ ,  $ExtSource$ ,  $NewOrder$ ,  $T$ )

```

---

**Algorithm 2** (continued)

---

```

53: function ADDTORULES(Source):
54:   for order in [1..len(Source) + 1] do
55:      $s = \text{Source}[0 : \text{order}]$ 
56:     if not  $s$  in  $D$  or  $\text{len}(D[s]) == 0$  then
57:       EXTENDSOURCE( $s[1:]$ )
58:     for  $t$  in  $C[s]$  do
59:       if  $C[s][t] > 0$  then
60:          $R[s][t] = C[s][t]$ 
61:
62: function EXTENDSOURCE(Curr)
63:   if Curr in SourceToExtSource then
64:     return SourceToExtSource[Curr]
65:   else
66:     EXTENDOBSERVATION(Curr)
67:     if Curr in SourceToExtSource then
68:       return SourceToExtsource[Curr]
69:     else
70:       return  $\emptyset$ 
71:
72: function EXTENDOBSERVATION(Source)
73:   if length(Source) > 1 then
74:     if not Source[1 :] in ExtC or ExtC[Source] =  $\emptyset$  then
75:       EXTENDOBSERVATION(Source[1 :])
76:   order = length(Source)
77:   define ExtC as nested counter
78:   for Tindex, index in StartingPoints[Source] do
79:     if  $\text{index} - 1 \leq 0$  and  $\text{index} + \text{order} < \text{length}(T[\text{Tindex}])$  then
80:       ExtSource = T[Tindex][index - 1 : index + order]
81:       ExtC[ExtSource][Target] + = 1
82:       StartingPoints[ExtSource].add((Tindex, index - 1))
83:   if ExtC =  $\emptyset$  then
84:     return
85:   for S in ExtC do
86:     for t in ExtC[s] do
87:       if ExtC[s][t] < MinSupport then
88:         ExtC[s][t] = 0
89:         C[s][t] + = ExtC[s][t]
90:     CsSupport =  $\sum \text{ExtC}[s][*]$ 
91:     for t in ExtC[s] do
92:       if ExtC[s][t] > 0 then
93:          $D[s][t] = \text{ExtC}[s][t] / \text{CsSupport}$ 
94:         SourceToExtSource[s[1 :]].add(s)
95:
96: function BUILDSOURCETOEXTSOURCE(order)
97:   for source in D do
98:     if len(source) = order then
99:       if len(source) > 1 then
100:        NewOrder = len(source)
101:        for startingin[1..len(source)] do
102:          curr = source[starting :]
103:          if not curr in SourceToExtSource then
104:            SourceToExtSource[curr] =  $\emptyset$ 
105:          if not NewOrder in SourceToExtSource[curr] then
106:            SourceToExtSource[curr][NewOrder] =  $\emptyset$ 
107:            SourceToExtSource[curr][NewOrder].add(source)

```

---

| <i>MinSupport</i> | 1     | 2   | 3     | 4     | 5     |
|-------------------|-------|-----|-------|-------|-------|
| Precision         | 0.667 | 0.5 | 0.333 | 0.167 | 0.167 |
| Recall            | 1     | 0.5 | 0.5   | 0.5   | 0.5   |

**Table 2** Precision and recall values for the anomaly detection task using BuildHON with different values of *MinSupport*.

**Effect of *MinSupport*.** In this section, we discuss the effect of *MinSupport* parameter (in BuildHON) on the anomaly detection performance. We want to answer the following question: Can we find an optimal value for *MinSupport* using parameter sweeping for BuildHON? Here we show that any values higher than 1 result in lower performance for the anomaly detection using BuildHON. As a result, all the experiments in the manuscript use *MinSupport*=1 for BuildHON.

We evaluate the anomaly detection performance on the real-world and synthetic data with different values of *MinSupport* for BuildHON. The results for the real-world data are shown in Table 2. We notice that for this data, *MinSupport*=1 was the best value, as a higher value led to a decrease in recall and precision both. The total running time for building the HONs (with different values of *MinSupport*) was not significant (order of a few seconds with parallel processing), as the size of the networks is small.

However, the computational time for building the HONs for the synthetic data was significantly higher. The total running time for the parameter sweeping process was 4.372 hours (using parallel processing). On the other hand, the anomaly detection performance was the same for the different *MinSupport* values we tried (1 - 5). This is expected since the synthetic data does not have any noisy patterns.

Note that, *MinSupport* is a global threshold that applies to all paths regardless of order or support. This threshold should have the ability to vary by path/order/support. For example, we may want to preserve paths that their distribution is very different from their lower-order variant, despite having smaller support. Parameter sweeping for *MinSupport* does not necessarily help to preserve significant rules while pruning noise, because it might prune lower orders too aggressively or prune higher-order too mildly. It can also be too aggressive for significantly different paths, or too mild for similar paths.
